# Supplementary material for: Bacillus velezensis HBXN2020 alleviates Salmonella Typhimurium infection in mice by improving intestinal barrier integrity and reducing inflammation
Source: eLife journal article supplement (doi:10.7554/elife.93423), 2024-03-12
Supplement: fig1-figsupp1-data1 [file elife-93423-fig1-figsupp1-data1-v1.zip]

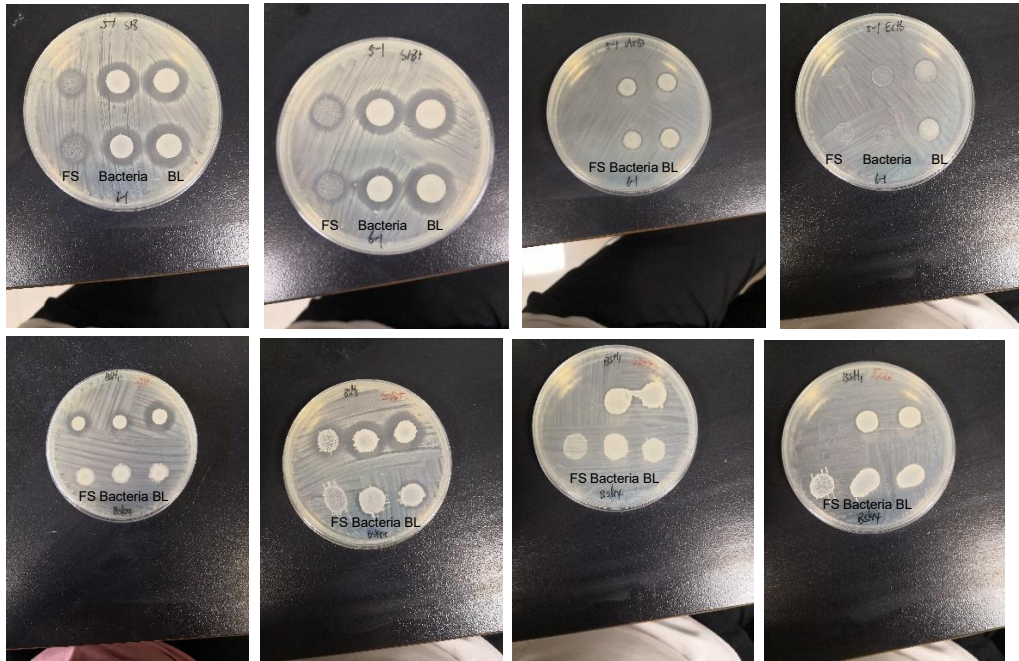

Figure 1—figure supplement 1. Antibacterial screening of four *Bacillus* strains. FS : Fermentation supernatant; BL: Bacteria liquid.
