# Supplementary material for: Bacillus velezensis HBXN2020 alleviates Salmonella Typhimurium infection in mice by improving intestinal barrier integrity and reducing inflammation
Source: eLife journal article supplement (doi:10.7554/elife.93423), 2024-03-12
Supplement: fig5-figsupp1-data2 [file elife-93423-fig5-figsupp1-data2-v1.zip]

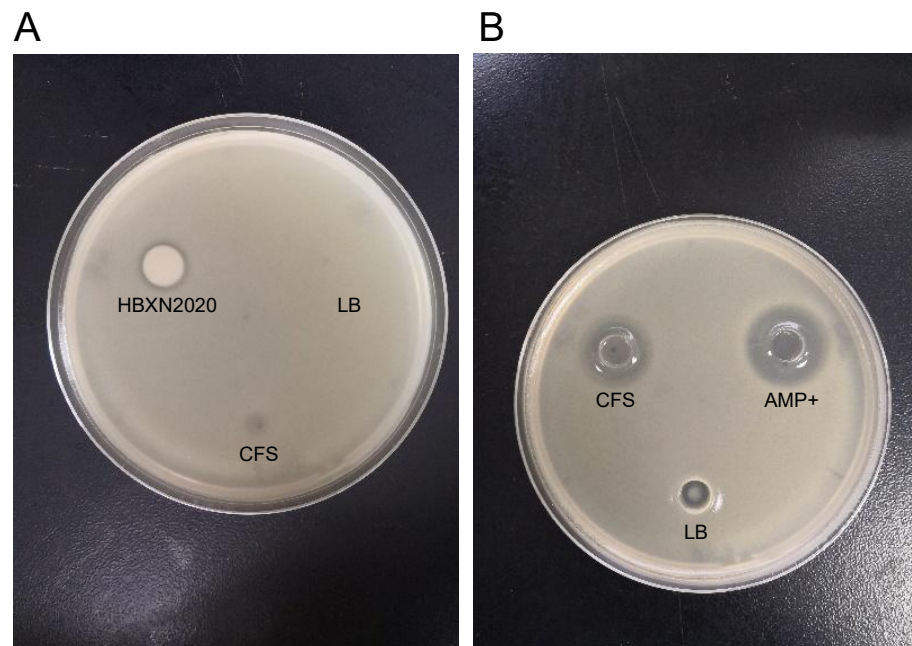

Figure 5—figure supplement 1A, B. The antibacterial activity of *B. velezensis* HBXN2020 and its fermentation supernatant against *S. Typhimurium* ATCC14028 in solid culture media.
