# Supplementary material for: Bacillus velezensis HBXN2020 alleviates Salmonella Typhimurium infection in mice by improving intestinal barrier integrity and reducing inflammation
Source: eLife. 2024 Nov 19;13:RP93423. doi: 10.7554/eLife.93423 (PMC11575897; doi:10.7554/eLife.93423)
Supplement: Figure 1—source data 1. [file elife-93423-fig1-data1.xlsx]

## Sheet: Sheet1
	Figure 1—source data 1
	Figure 1A. source data: Growth curves of B. velezensis HBXN2020 cultured in LB medium.
	Time(h)	OD600nm
	0	0.101	0.099	0.093
	1	0.134	0.135	0.132
	2	0.177	0.178	0.175
	3	0.285	0.29	0.272
	4	0.393	0.397	0.401
	5	0.507	0.515	0.512
	6	0.644	0.637	0.634
	7	0.724	0.747	0.747
	8	0.813	0.815	0.791
	9	0.864	0.862	0.858
	10	0.903	0.874	0.883
	11	0.919	0.893	0.89
	12	0.924	0.896	0.903
	13	0.925	0.905	0.902
	14	0.918	0.917	0.903
	15	0.935	0.926	0.915
	16	0.948	0.937	0.923
	17	0.931	0.945	0.912
	18	0.944	0.937	0.919
	19	0.938	0.929	0.937
	20	0.928	0.917	0.922
	21	0.915	0.908	0.916
	22	0.903	0.893	0.899
	23	0.851	0.875	0.872
	24	0.852	0.85	0.844
	Figure 1B. source data: Survival rate of spore and vegetative cells of B. velezensis HBXN2020 after 20 min at different temperatures.
		endosporeof B. velezensis HBXN2020			vegetative cells of B. velezensis HBXN2020
	37°C	100	100	100	100	100	100
	45°C	102.577	104.478	100	76	71.9424	82.8125
	55°C	97.9381	103.483	97.6415	12.48	11.7266	13.3594
	65°C	103.608	102.985	93.8679	0.52	0.503597	0.664062
	75°C	104.124	97.5124	98.1132	0.0012	0.000928058	0.0011875
	85°C	103.093	97.5124	98.1132	0	0	0
	95°C	82.4742	84.5771	85.3774	0	0	0
	Figure 1C. source data: Survival rate of spore and vegetative cells of B. velezensis HBXN2020 after 20 min at acid solution.
		Endosporeof B. velezensis HBXN2020			Vegetative cells of B. velezensis HBXN2020
	PH 7	100	100	100	100	100	100
	PH 6	89.8305	93.3333	108.081	57.1429	52.9412	47.619
	PH 5	84.7458	100	93.9394	19.5918	18.2353	18.7619
	PH 4	72.8814	71.6667	83.8384	1.64286	1.54902	1.72381
	PH 3	71.1864	75.9259	80.404	0.72449	0.617647	0.571429
	PH 2	67.7966	69.4444	78.5859	0.0102041	0.0147059	0.0114286
	Figure 1D. source data: Survival rate of spore and vegetative cells of B. velezensis HBXN2020 at 0.3% bile salts.
		Vegetative cells of B. velezensis HBXN2020			Endosporeof B. velezensis HBXN2020
	0 min	100	100	100	100	100	100
	10 min	87.931	80.6452	81.8182	95.2	99.2	88.9706
	20 min	43.1034	56.4516	54.5455	101.6	94.4	95.5882
	30 min	22.5862	20.1613	23.2727	101.6	104	91.9118
	60 min	0.344828	0.564516	0.454545	104	94.4	99.2647
	120 min	0.0217241	0.0193548	0.0238182	97.6	102.4	102.206
	180 min	0.00344828	0.00403226	0.00345454	87.2	94.4	80.8824
	Figure 1E. source data: Survival rate of spore and vegetative cells of B. velezensis HBXN2020 at SGF.
		Vegetative cells of B. velezensis HBXN2020			Endosporeof B. velezensis HBXN2020
	0 min	100	100	100	100	100	100
	5 min	51.2195	50	55.0562	99.1667	99.2857	95.5882
	10 min	34.1463	25	28.0899	96.9231	93.0769	94.8905
	15 min	2.43902	3.75	3.37079	95.3846	88.806	87.8571
	30 min	0.0268293	0.035	0.0370787	77.8626	70.2899	78.5714
	60 min	0.00268293	0.003125	0.00348315	71.875	71.0145	73.1343
	120 min	0	0	0	67.2414	68.9076	68.3333
	Figure 1F. source data: Survival rate of spore and vegetative cells of B. velezensis HBXN2020 at SIF.
		Vegetative cells of B. velezensis HBXN2020			Endosporeof B. velezensis HBXN2020
	0 h	100	100	100	100	100	100
	0.5 h	72.2222	76.1905	55.5556	107.547	98.1481	99.0099
	1 h	32.7778	28.8095	29.1111	105.085	103.636	111.504
	2 h	15.5556	12.8571	13.5556	106.306	103.478	101.786
	4 h	10.5556	10	10	114.953	104.386	100.806
	6 h	0.583333	0.761905	0.577778	113.084	107.207	103.306
