# Supplementary material for: Bacillus velezensis HBXN2020 alleviates Salmonella Typhimurium infection in mice by improving intestinal barrier integrity and reducing inflammation
Source: eLife. 2024 Nov 19;13:RP93423. doi: 10.7554/eLife.93423 (PMC11575897; doi:10.7554/eLife.93423)
Supplement: Figure 2—source data 1. [file elife-93423-fig2-data1.xlsx]

## Sheet: Sheet1
	Figure 2—source data 1
	Figure 2A. source data: Antibiotic susceptibility of B. velezensis HBXN2020.
	Ampicillin			Meropenem			Piperacillin			Gentamycin			Tetracycline			Doxycycline			Minocycline			Erythromycin			Enrofloxacin			Ofloxacin			Sulfamethoxazole			Trimethoprim/sulfamethoxazole			Polymyxin B			Teicoplanin			Trimethoprim			Florfenicol			Spectinomycin
	30.41	30.43	30.42	39.31	39.3	39.29	25.1	25.08	25.1	18.3	18.25	18.12	20.16	20.13	20.05	25.2	26.31	26.29	32.21	32.53	31.92	26.95	26.92	26.89	29.16	29.14	29.12	33.73	33.7	33.72	21.12	21.11	21.11	32	31.98	31.98	13.95	13.9	13.89	22.89	22.81	22.85	31.9	31.87	31.85	29.86	29.85	29.85	22.62
	Figure 2B. source data: The bacteriostasis assay of B. velezensis HBXN2020 in vitro.
	E. coli ATCC25922			E. coli ATCC35150			E. coli EC024			S. Typhimurium ATCC14028			S. Typhimurium SL1344			S. Enteritidis SE006			S. aureus ATCC29213			S. aureus ATCC43300			S. aureus S21			C. perfringens CVCC2030			C. perfringens CP023			C. perfringens CP002			S. suis SC19			S. suis SS006			P. multocida PM002			P. multocida PM008			A. pleuropneumoniae APP015
	18.05	18.12	18.08	16	16	16	18	18	18	17	17	17	17	17	17	19	19	19	19	19	19	18	18	18	19	19	19	23	22	23	29	29	29	25	25	25	12.5	13	12.5	13	13	12.5	15	15.5	15.5	16	16.5	16.5	13
[truncated: 8 more columns]
