# Supplementary material for: Bacillus velezensis HBXN2020 alleviates Salmonella Typhimurium infection in mice by improving intestinal barrier integrity and reducing inflammation
Source: eLife. 2024 Nov 19;13:RP93423. doi: 10.7554/eLife.93423 (PMC11575897; doi:10.7554/eLife.93423)
Supplement: Figure 4—figure supplement 1—source data 1. [file elife-93423-fig4-figsupp1-data1.xlsx]

## Sheet: Sheet1
	Figure 4—figure supplement 1-source data 1
	Figure 4—figure supplement 1A. source data: Blood routine parameters.
		Control			H-HBXN2020
	HCT	41.2	39.08	41.24	40.93	40.93	42.18
	Figure 4—figure supplement 1B. source data: Blood routine parameters.
		Control			H-HBXN2020
	MCHC	326	325	323	312	320	298
