# Supplementary material for: Bacillus velezensis HBXN2020 alleviates Salmonella Typhimurium infection in mice by improving intestinal barrier integrity and reducing inflammation
Source: eLife. 2024 Nov 19;13:RP93423. doi: 10.7554/eLife.93423 (PMC11575897; doi:10.7554/eLife.93423)
Supplement: Figure 4—source data 1. [file elife-93423-fig4-data1.xlsx]

## Sheet: Sheet1
	Figure 4—source data 1
	Figure 4A. source data: Body weights changes of mice in Control, L-HBXN2020, M-HBXN2020 and H-HBXN2020 groups. ﻿
		Control					L-HBXN2020					M-HBXN2020					H-HBXN2020
	0d	14.75	16.1	16.34	16.16	15.74	15.05	15.9	16.17	15.94	16	14.84	15.3	16	16.61	16.03	15.33	16.11	15.39	15.81	16.12
	2d	16	17.66	16.62	16.26	16.23	17	17.05	17.2	16.93	16.6	16.7	17.1	16.23	17.01	16.72	16.82	17.08	16.75	16.42	16.94
	4d	17.06	17.93	17.33	17.89	17.36	18.21	18.98	18.62	18.21	17.08	17.98	18.25	17.64	17.91	18.02	17.99	17.94	17.44	17.5	18.06
	6d	18.85	18.69	18.53	18.29	18.2	18.91	19.23	19.03	18.72	18.23	18.83	18.73	17.95	18.37	18.48	18.83	19.01	18.58	18.77	19.15
	8d	19.26	18.67	19.22	19.12	18.78	19.31	19.67	19.72	19.15	19.09	20.67	19.57	19.33	19.19	19.55	19.52	19.84	19.16	19.59	19.62
	10d	19.84	19.8	19.94	19.5	19.51	19.35	20.59	19.56	19.45	19.8	20.55	19.79	19.25	19.45	19.72	19.95	20.17	19.59	20.11	19.95
	12d	19.91	19.94	19.83	19.5	19.17	19.2	20.55	19.72	19.23	19.57	20.59	20.35	19.25	19.45	19.96	19.64	20.26	20.01	20.12	19.72
	14d	19.57	20.42	19.38	19.11	20.7	19.21	20.61	19.78	19.66	19.75	20.7	20.73	19.21	19.55	20.42	20.23	20.16	20.32	20.2	20.13
	Figure 4B. source data: The mRNA levels of Tnfa, Il1b, Il6 and Il10 in the colon of mice from Control, L-HBXN2020, M-HBXN2020 and H-HBXN2020 groups.
		Control					L-HBXN2020					M-HBXN2020					H-HBXN2020
	Tnfa	1.00022	1.17773	1.08403	1.02937	1.33131	1.11692	1.04788	1.22943	1.71799	1.02048	1.14113	1.54997	1.16355	1.16894	1.00045	0.890142	1.16084	1.11179	1.43176	1.12809
	Il1b	1.1086	1.16699	1.02278	1.03914	1.07548	0.193294	1.25442	1.65094	1.64034	1.45923	0.133826	1.0594	1.48838	1.09346	1.25891	0.39095	0.978612	1.26743	1.35313	1.59327
	Il6	1.2525	1.119	1.1484	1.3006	1.03425	0.458065	0.876112	1.04204	0.824574	0.867422	0.325143	1.38274	1.49728	1.14858	1.40221	0.342783	1.04545	1.0314	1.36211	1.74997
	Il10	1.20448	1.09964	1.17816	1.00658	1.08531	0.751563	1.65431	1.16209	1.38507	1.23137	1.22616	1.31538	1.47377	1.56559	0.654136	0.426677	1.65581	0.800926	1.54599	1.56708
	Figure 4C. source data: The mRNA levels of barrier protein Tjp1, Ocln, Cldn1, and Muc2 in the colon of mice from Control, L-HBXN2020, M-HBXN2020 and H-HBXN2020 groups.
		Control					L-HBXN2020					M-HBXN2020					H-HBXN2020
	Tjp1	0.989557	1.10611	0.904336	0.543417	0.510875	0.711516	1.7086	1.28617	0.869079	0.930695	1.07974	1.01669	0.690819	0.905192	1.32521	1.14574	1.21931	0.466577	1.02947	1.07227
	Ocln	0.831001	0.224824	0.982179	0.770845	1.24698	0.337179	0.382732	2.08066	1.10334	1.16982	1.42811	2.47695	1.03122	0.218355	0.314688	1.12182	1.0522	1.71872	0.785099	0.534835
	Cldn1	0.538911	1.65174	1.06824	0.896744	1.03502	1.52751	0.919759	1.22059	0.428111	0.375733	0.758621	0.240923	0.261114	1.14517	1.45139	0.586028	0.429739	0.329542	2.20326	1.64056
	Muc2	0.983061	1.07084	0.946097	1.95808	0.651504	1.09016	2.07748	0.572328	0.35343	0.538322	1.98915	0.422379	0.63977	0.910708	0.916853	0.71806	1.2477	0.765279	1.15357	0.985652
	Figure 4D. source data: Major blood routine parameters of mice in the control and H-HBXN2020 group.
		RBC			MCV			MCH			HGB			WBC			PLT
	Control	9.74	9.22	9.64	42	42	43	13.8	13.8	13.8	134	127	133	7.09	4.12	4.2	404	392	323
	H-HBXN2020	9.54	9.43	9.72	43	43	43	13.4	13.9	12.9	128	131	126	4.53	7.71	6.1	340	344	450
	Figure 4E. source data: Serum biochemical parameters of mice in the control and H-HBXN2020 group. ﻿
		ALT			AST			ALB			TBIL			CREA			BUN
	Control	33.5	27.8	45.6	113.1	175.5	132.8	51.3	49.9	39.1	4	3.4	4.5	52	60	52	6.7	6.8	5.4
	H-HBXN2020	25.6	41.5	38.8	101.3	145.5	123.6	40.1	39.3	33.2	2.2	2.2	3.4	28	54	65	6.9	6.1	6
