# Supplementary material for: Bacillus velezensis HBXN2020 alleviates Salmonella Typhimurium infection in mice by improving intestinal barrier integrity and reducing inflammation
Source: eLife. 2024 Nov 19;13:RP93423. doi: 10.7554/eLife.93423 (PMC11575897; doi:10.7554/eLife.93423)
Supplement: Figure 5—figure supplement 1—source data 1. [file elife-93423-fig5-figsupp1-data1.xlsx]

## Sheet: Sheet1
	Figure 5—figure supplement 1—source data 1
	Figure 5—figure supplement 1C. source data: Diameter of inhibition zone in the spot-on lawn assay and agar well diffusion assay.
	CFS			HBXN2020			LB			CFS			AMP			LB
	6	6	6	11	11	11.5	0	0	0	13	12.5	12	18	18	17.5	0	0	0
	Figure 5—figure supplement 1D. source data: S. Typhimurium ATCC14028 (STm) were co-incubated with B. velezensis HBXN2020 in LB medium at various ratios at 37°C
		STm:HBXN2020 (1:1)						STm:HBXN2020 (1:10)						STm:HBXN2020 (1:50)						STm:HBXN2020 (1:100)
		HBXN2020/STm			STm			HBXN2020/STm			STm			HBXN2020/STm			STm			HBXN2020/STm			STm
	6 h	320000000	250000000	240000000	508000000	490000000	515000000	160000000	130000000	210000000	496000000	505000000	540000000	13000000	17000000	15000000	520000000	490000000	520000000	9000000	8900000	8100000	600000000	510000000	487000000
	12 h	210000000	260000000	220000000	690000000	680000000	650000000	39000000	47000000	55000000	700000000	830000000	710000000	13000000	11000000	11000000	730000000	820000000	740000000	2100000	3200000	2300000	800000000	830000000	760000000
	18 h	140000000	100000000	90000000	1520000000	1580000000	1710000000	65000000	49000000	54000000	1710000000	1690000000	1650000000	37000000	52000000	46000000	1600000000	1590000000	1630000000	10000000	6000000	4000000	1520000000	1600000000	1590000000
	30 h	220000000	150000000	280000000	2400000000	2500000000	2900000000	106000000	117000000	100000000	1500000000	1300000000	1500000000	20000000	23000000	26000000	2100000000	1800000000	2400000000	3000000	7000000	8000000	1500000000	1500000000	1300000000
