# Supplementary material for: Bacillus velezensis HBXN2020 alleviates Salmonella Typhimurium infection in mice by improving intestinal barrier integrity and reducing inflammation
Source: eLife. 2024 Nov 19;13:RP93423. doi: 10.7554/eLife.93423 (PMC11575897; doi:10.7554/eLife.93423)
Supplement: Figure 5—figure supplement 2—source data 1. [file elife-93423-fig5-figsupp2-data1.xlsx]

## Sheet: Sheet1
	Figure 5—figure supplement 2—source data 1
	Figure 5—figure supplement 2A. source data: The bacterial load of B. velezensis HBXN2020 in mouse feces.
	1d					3d					5d					7d
	1.60377e+06	4.08451e+06	428668	108349	2.3176e+06	147619	98939.3	17419.5	491304	94915.5	15151.5	120219	3523.95	9650	2866	333.333	555.556	1600	683.333	157.286
	Figure 5—figure supplement 2B. source data: The bacterial loads of S. Typhimurium ATCC14028 in ileum.
	STm+PBS						STm+HBXN2020						STm+CIP
	1.01667e+07	1.02857e+07	3.33333e+07	15000000	1.05263e+06	1.17647e+07	127778	717949	5.20833e+06	76923.1	709677	3.52941e+06	708333	800000	400000	52631.6	842105	83333.3
	Figure 5—figure supplement 2C. source data: Histological scores of colons.
	Control			HBXN2020			STm+PBS			STm+HBXN2020			STm+CIP
	1	1	1	2	1	1	8	7	5	4	4	3	5	4	5
