# Supplementary material for: Bacillus velezensis HBXN2020 alleviates Salmonella Typhimurium infection in mice by improving intestinal barrier integrity and reducing inflammation
Source: eLife. 2024 Nov 19;13:RP93423. doi: 10.7554/eLife.93423 (PMC11575897; doi:10.7554/eLife.93423)
Supplement: Figure 5—source data 1. [file elife-93423-fig5-data1.xlsx]

## Sheet: Sheet1
	Figure 5—source data 1
	Figure 5A. source data: In vitro Bacterial competition between STm and B. velezensis HBXN2020
		HBXN2020/STm (1：1)			STm (1：1)			HBXN2020/STm (1：10)			STm (1：10)			HBXN2020/STm (1：50)			STm (1：50)			HBXN2020/STm (1：100)			STm (1：100)
	0h	10000	12000	16000	8600	9100	11200	8000	14000	16000	9000	8200	7700	7500	7800	6500	9000	8100	7600	7000	7600	8100	9000	8200	7700
	1h	45000	56000	42000	15000	12000	12000	27000	34000	32000	14000	13000	10000	22000	18000	17000	14000	12000	9000	12000	14800	13500	14000	13000	10000
	2h	350000	320000	300000	72000	65000	71000	220000	260000	180000	49000	72000	63000	66000	64000	83000	63000	75000	70000	54000	62000	73000	49000	72000	63000
	3h	7900000	7300000	7400000	132000	800000	1300000	4700000	3800000	4800000	1300000	1400000	1600000	300000	220000	240000	1400000	1500000	1300000	200000	280000	220000	2000000	1500000	1300000
	4h	49000000	75000000	62000000	56000000	51000000	50000000	54000000	65000000	63000000	44000000	56000000	62000000	460000	500000	390000	65000000	53000000	49000000	560000	520000	730000	48000000	54000000	75000000
	5h	140000000	150000000	170000000	252000000	168000000	206000000	133000000	135000000	150000000	236000000	214000000	189000000	2000000	1610000	1720000	198000000	210000000	214000000	3000000	3500000	2400000	250000000	196000000	211000000
	6h	320000000	250000000	240000000	508000000	490000000	515000000	160000000	130000000	210000000	496000000	505000000	540000000	13000000	17000000	15000000	520000000	490000000	520000000	9000000	8900000	8100000	600000000	510000000	487000000
	7h	270000000	300000000	230000000	600000000	620000000	640000000	210000000	230000000	170000000	620000000	690000000	590000000	23000000	28000000	24000000	610000000	620000000	650000000	13000000	11000000	9000000	670000000	610000000	660000000
	8h	340000000	261000000	250000000	710000000	640000000	620000000	310000000	190000000	230000000	700000000	640000000	680000000	35000000	36000000	28000000	660000000	700000000	640000000	14000000	18000000	16000000	740000000	700000000	650000000
	9h	320000000	313000000	270000000	600000000	680000000	690000000	230000000	150000000	170000000	730000000	700000000	630000000	23000000	19000000	22000000	700000000	650000000	740000000	13000000	11000000	9000000	770000000	740000000	820000000
	10h	220000000	280000000	230000000	640000000	620000000	600000000	71000000	88000000	83000000	660000000	670000000	700000000	12000000	18000000	19000000	600000000	600000000	630000000	5400000	4300000	4500000	740000000	760000000	820000000
	11h	300000000	340000000	310000000	650000000	660000000	610000000	57000000	49000000	63000000	590000000	640000000	700000000	10000000	16000000	18000000	670000000	780000000	600000000	3600000	3100000	4300000	700000000	740000000	780000000
	12h	210000000	260000000	220000000	690000000	680000000	650000000	39000000	47000000	55000000	700000000	830000000	710000000	13000000	11000000	11000000	730000000	820000000	740000000	2100000	3200000	2300000	800000000	830000000	760000000
	Figure 5C. source data: Bacterial count of STm in mouse feces from STm+PBS, STm+HBXN2020 and STm+CIP groups.
		STm+PBS						STm+HBXN2020						STm+CIP
	1d	1.33333e+08	220000000	96000000	130000000	22500000	156000000	224000000	230000000	225000000	1.14286e+07	15000000	120000000	42000000	314000000	43800000	72500000	1.46667e+08	197500000
	2d	1.16667e+06	2750000	800000	1800000	1400000	1400000	125000	300000	1.57143e+06	285714	240000	42857.1	800000	142857	222222	250000	80000	25000
	3d	350000	1.03833e+06	285714	840000	200000	166667	85000	75000	36666.7	110000	100000	120000	25000	100000	20000	142857	34285.7	57777.8
	4d	480000	60000	116667	200000	50000	107143	33600	12500	20000	62333.3	17400	77500	3600	10000	5000	10000	30666.7	10000
	5d	2500000	4.03333e+06	933333	3075000	503333	110000	36000	177500	30000	250000	180000	70000	403333	2500	175000	10000	6000	2000
	6d	8625000	6.18182e+06	8700000	1875000	1.55556e+06	2.66667e+06	444444	100000	171429	118182	1250000	300000	375000	500000	428571	500000	700000	3.13333e+06
	7d	2500000	5500000	2000000	2000000	2250000	3000000	166667	375000	75000	150000	83333.3	514286	75000	66666.7	60000	62500	40000	21666.7
	Figure 5D. source data: The bacterial loads of STm in cecum from STm+PBS, STm+HBXN2020 and STm+CIP groups.
	STm+PBS						STm+HBXN2020						STm+CIP
	5.26316e+07	3.40909e+07	1500000	2.85714e+07	2.14286e+06	18750000	3.26087e+06	880000	888889	1.88235e+06	842105	300000	2.85714e+06	253846	130000	76923.1	307692	83333.3
	Figure 5E. source data: The bacterial loads of STm in colon from STm+PBS, STm+HBXN2020 and STm+CIP groups.
	STm+PBS						STm+HBXN2020						STm+CIP
	2600000	2350000	2750000	2200000	2.14286e+06	4050000	21568.6	25000	50000	127500	66666.7	88461.5	13333.3	16666.7	71428.6	40000	3333.33	19000
	Figure 5F. source data: Daily body weight changes of mice in Control, HBXN2020, STm+PBS, STm+HBXN2020 and STm+CIP groups.
		Control						HBXN2020						STm+PBS						STm+HBXN2020						STm+CIP
	0d	100	100	100	100	100	100	100	100	100	100	100	100	100	100	100	100	100	100	100	100	100	100	100	100	100	100	100	100	100	100
	1d	99.3579	98.7269	102.917	99.5349	100.242	100.224	99.7558	101.963	97.7916	101.086	103.025	100.501	102.288	101.906	103.496	100.585	101.843	100.741	101.037	102.004	104.535	97.958	105.366	103.683	98.7269	101.421	100.463	101.666	99.5152	99.2214
	2d	100.467	98.206	98.8095	100.698	99.0315	100.224	102.991	98.8344	97.3952	102.111	102.654	101.126	101.471	102.242	98.6127	94.9649	99.6929	98.9506	98.7896	100.891	103.461	97.7311	101.621	104.018	103.356	103.967	100.926	101.551	104.848	97.8309
	3d	101.401	97.8009	98.9286	101.279	100.061	100.28	104.274	100	97.282	100.603	102.222	102.003	99.0196	101.233	94.8946	96.1944	98.7101	100.123	96.3112	96.882	104.535	95.122	99.7205	103.516	101.62	105.388	102.72	104.136	102.121	99.1657
	4d	103.911	98.4954	99.5833	101.047	97.6392	99.9441	104.029	100.061	97.735	101.327	101.914	100.626	93.4641	96.1883	90.677	94.1452	97.543	97.6543	90.951	98.3853	100.06	95.7459	100.168	103.85	100.405	104.796	99.6528	103.906	100.364	98.9989
	5d	103.97	97.5116	98.1548	101.047	100.484	100.112	104.762	101.166	96.7724	105.971	104.012	102.003	86.4924	92.0964	83.9068	86.4169	92.2604	81.7284	83.6311	93.4298	94.5704	95.8026	97.5964	97.2098	94.7917	99.1119	99.8264	104.595	94.303	98.832
	6d	101.343	99.0741	99.881	101.047	100.847	101.902	103.907	102.086	97.8482	105.066	103.025	102.503	66.8845	76.5695	83.1853	81.4988	77.3956	84.4444	91.7003	81.1247	96.1814	94.3279	94.019	91.6295	85.3588	94.1978	97.9745	102.929	86.4242	99.1657
	7d	101.751	100.579	101.012	101.919	101.453	102.629	104.64	103.19	99.0374	103.981	104.074	103.504	60.5664	68.778	74.5838	75.2927	61.9165	75.1852	91.5274	82.7394	89.6778	90.8111	89.7708	90.2902	82.4074	93.7241	94.2708	101.379	83.2727	98.3315
	Figure 5G. source data: Daily disease activity index (DAI) scores of mice in Control, HBXN2020, STm+PBS, STm+HBXN2020 and STm+CIP groups.
		Control						HBXN2020						STm+PBS						STm+HBXN2020						STm+CIP
	0d	0	0	0	0	0	0	0	0	0	0	0	0	0	0	0	0	0	0	0	0	0	0	0	0	0	0	0	0	0	0
	1d	1	1	0	0	0	0	1	0	1	0	0	0	2	2	2	2	2	2	1	1	1	2	1	1	1	0	0	0	0	0
	2d	0	1	1	0	0	0	1	1	1	0	0	0	3	2	4	5	3	4	2	1	1	2	1	1	0	0	0	0	0	1
	3d	0	1	1	0	0	0	0	1	1	0	0	0	4	3	5	5	4	3	2	2	1	2	1	1	0	0	1	0	0	0
	4d	0	1	0	0	1	0	0	0	1	1	0	0	6	4	6	6	4	5	3	2	1	2	1	1	1	1	2	1	1	2
	5d	0	1	1	0	0	0	0	0	1	0	0	0	6	6	8	7	6	7	5	3	3	2	2	2	3	2	2	1	3	2
	6d	0	0	0	0	0	0	0	1	1	0	0	0	8	8	8	7	7	8	3	5	2	3	3	3	4	3	3	1	4	2
	7d	0	0	0	0	0	0	0	0	1	0	0	0	7	8	8	7	8	8	3	5	3	3	4	3	5	3	3	1	5	2
	Figure 5I. source data: The length of the colon from Control, HBXN2020, STm+PBS, STm+HBXN2020 and STm+CIP groups.
	Control						HBXN2020						STm+PBS						STm+HBXN2020						STm+CIP
	6.1	6.4	6.4	6.8	7.2	6.7	6.5	6.3	5.9	6.3	6.7	6.5	4.9	4.7	5	6	5.6	5.5	5.9	6.3	6.2	6.1	6.1	5.7	6.6	5.1	5.8	6.3	5.3	5.7
