# Supplementary material for: Bacillus velezensis HBXN2020 alleviates Salmonella Typhimurium infection in mice by improving intestinal barrier integrity and reducing inflammation
Source: eLife. 2024 Nov 19;13:RP93423. doi: 10.7554/eLife.93423 (PMC11575897; doi:10.7554/eLife.93423)
Supplement: Figure 6—source data 1. [file elife-93423-fig6-data1.xlsx]

## Sheet: Sheet1
	Figure 6—source data 1
	Figure 6B. source data: The mRNA levels of Tnfa in colon tissue from Control, HBXN2020, STm+PBS, STm+HBXN2020, and STm+CIP groups.
	Control					HBXN2020					STm+PBS					STm+HBXN2020					STm+CIP
	1.28884	1.16225	1.07355	1.07301	2.09249	0.312358	0.414456	0.380608	0.609335	0.0668608	2.14388	1.5807	2.58668	2.64228	3.34175	1.21838	0.84051	1.07484	2.25104	0.255695	1.29008	0.568711	0.515849	1.81096	0.487282
	0.73088	1.10158	1.02497	0.930512	0.445539	0.25907	0.258482	0.268813	0.231538	0.0640232	0.976076	1.03797	2.21856	2.753	1.91571	1.20428	1.01612	1.29663	1.91454	0.288962	0.483279	0.70357	0.400873	1.69288	0.230763
	0.980277	0.736171	0.901489	0.996476	0.461968	0.186985	0.281542	0.292448	0.308703	0.0504175	0.98433	1.127	1.51621	2.34044	1.41445	1.28699	0.847121	1.30865	2.0883	0.364582	0.465355	0.526009	0.259259	1.50682	0.101594
	Figure 6C. source data: The mRNA levels of Il1b in colon tissue from Control, HBXN2020, STm+PBS, STm+HBXN2020, and STm+CIP groups.
	Control					HBXN2020					STm+PBS					STm+HBXN2020					STm+CIP
	1.01523	1.05739	1.11439	1.16108	1.14355	0.262161	0.161708	1.12143	0.678529	0.319734	0.594312	1.47438	4.91421	0.700802	1.18096	0.297954	0.47218	2.05854	0.976685	0.407801	0.531058	0.550941	3.18665	0.410787	0.289184
	0.83243	1.04861	1.08096	1.00894	1.14338	0.236805	0.181329	1.17935	0.605017	0.245035	0.494171	1.38147	6.44022	1.14467	1.48473	0.336038	1.84209	2.82701	0.441539	0.323357	0.596213	0.581024	3.54601	0.520598	0.331389
	1.15234	0.894001	0.804644	0.829977	0.713074	0.286658	0.171109	2.91398	0.376119	0.200367	0.578514	1.49325	6.08369	0.579351	2.30001	0.551285	1.3647	1.74764	0.303539	0.709445	0.78288	0.407158	3.00503	0.539015	0.264051
	Figure 6D. source data: The mRNA levels of Il6 in colon tissue from Control, HBXN2020, STm+PBS, STm+HBXN2020, and STm+CIP groups.
	Control					HBXN2020					STm+PBS					STm+HBXN2020					STm+CIP
	1.08465	1.06617	1.11221	1.15311	0.984258	0.487661	1.00923	1.70027	1.13894	0.279332	1.48716	1.44717	1.4975	1.86634	2.12954	0.767664	1.87099	1.2687	1.18366	0.642304	2.01978	1.88286	1.69707	1.85694	0.669464
	0.807475	0.993142	0.96861	0.740638	1.02123	0.648015	0.854881	1.80038	0.98316	0.19701	1.43613	1.54447	1.25446	2.02581	1.6664	0.834037	1.30519	1.40633	2.15839	0.760926	1.0964	1.7955	1.31729	1.68987	0.612085
	1.10788	0.940693	0.919181	1.10625	0.994516	0.648183	0.918441	1.77525	1.46244	0.294055	1.41011	1.66897	1.84685	2.40654	2.35564	1.02648	1.38378	1.14622	1.13891	0.702796	1.11712	1.68251	1.83124	1.59165	0.682163
	Figure 6E. source data: The mRNA levels of Il10 in colon tissue from Control, HBXN2020, STm+PBS, STm+HBXN2020, and STm+CIP groups.
	Control					HBXN2020					STm+PBS					STm+HBXN2020					STm+CIP
	1.2018	1.28917	0.913045	0.744869	0.696004	0.22356	1.731	2.72126	1.93621	5.90405	0.493413	4.55073	0.624442	3.00016	2.29871	2.02082	2.75618	5.58999	0.576205	2.09528	0.42202	0.513881	1.03017	1.14411	0.395065
	0.922796	0.981152	1.0628	1.19883	1.26934	0.277658	0.641185	2.63772	5.02036	0.35646	1.1687	3.94891	2.96716	3.76223	1.20443	1.63221	3.86245	4.06592	4.05704	1.89593	0.359475	0.536588	0.956755	3.24864	0.44456
	0.875399	0.729682	1.02416	1.0563	1.03466	0.305362	1.88667	2.51701	2.72872	3.62974	2.14015	3.88488	1.48953	3.32111	2.43691	1.33067	3.10802	4.07565	0.494947	3.90306	0.338679	0.462622	0.579938	2.82504	0.697705
	Figure 6F. source data: The mRNA levels of Tjp1 in colon tissue from Control, HBXN2020, STm+PBS, STm+HBXN2020, and STm+CIP groups.
	Control					HBXN2020					STm+PBS					STm+HBXN2020					STm+CIP
	0.943276	0.978257	0.994072	1.14702	1.24742	1.82792	2.41752	2.30658	1.38846	0.366847	0.789084	1.03105	0.760976	1.17537	0.546397	1.80275	0.896148	2.7559	2.15954	0.570806	1.77345	1.71289	1.65873	0.751574	0.705673
	1.14891	1.01498	1.05955	1.07733	0.93843	2.69881	2.41277	1.1286	1.34005	0.437515	0.719634	0.774674	0.703129	1.0842	0.681671	1.40773	0.885515	3.25009	2.1939	0.570363	1.21672	2.11611	0.689807	0.77854	0.778429
	0.907816	1.00677	0.946379	0.775653	0.814151	2.51241	1.94976	1.01129	0.903944	0.314909	0.858384	0.68231	1.22781	0.845259	0.632428	1.49519	0.764999	2.88822	2.27822	0.419449	0.862032	1.49735	0.689121	1.48348	0.639593
	Figure 6G. source data: The mRNA levels of Ocln in colon tissue from Control, HBXN2020, STm+PBS, STm+HBXN2020, and STm+CIP groups.
	Control					HBXN2020					STm+PBS					STm+HBXN2020					STm+CIP
	0.745148	1.10572	1.5106	1.01773	1.84573	1.00096	1.16289	1.24991	1.14007	0.945071	0.325665	0.396839	0.706948	0.205138	0.808471	0.723435	0.511634	1.51995	0.8866	1.28015	0.875503	1.57484	0.757275	0.935375	0.775026
	1.04486	1.07187	0.465111	1.04562	0.647776	1.02023	1.18406	1.24607	1.10032	0.915512	0.489973	0.270901	0.43045	0.451864	1.00863	0.801629	0.708538	1.6217	0.900705	1.27916	0.658614	1.0102	0.627608	1.37028	0.666134
	1.21	0.822417	1.02429	0.93665	0.506493	0.858781	1.15807	1.28295	0.979376	0.931905	0.624076	0.298362	0.7579	0.567541	0.935765	0.967531	0.661778	1.30024	0.935325	0.504111	0.645591	1.08421	0.775078	1.13651	0.664099
	Figure 6H. source data: The mRNA levels of Cldn1 in colon tissue from Control, HBXN2020, STm+PBS, STm+HBXN2020, and STm+CIP groups.
	Control					HBXN2020					STm+PBS					STm+HBXN2020					STm+CIP
	1.16559	1.08311	0.910666	0.888836	0.926093	0.798234	4.46456	1.19472	1.59156	1.21965	0.275403	0.663313	1.49106	1.57533	0.264878	0.556702	0.344444	2.15283	5.74837	0.345228	0.231783	1.51886	1.61205	1.59045	0.389931
	0.962918	1.18382	0.98332	1.56655	1.4189	0.913681	2.34496	1.41768	1.46243	1.7304	0.229053	0.573022	1.69902	1.85729	0.265648	0.407591	0.304393	2.91853	4.26332	0.168917	0.245242	0.848372	2.36494	1.3862	0.700644
	0.871497	0.733072	1.10601	0.544616	0.65501	0.95754	1.87818	1.03535	1.67281	1.04501	0.283177	0.635883	1.37794	1.5696	0.13121	0.400827	0.41308	2.18168	3.93457	0.306746	0.195279	0.648099	2.21619	1.20234	0.241025
	Figure 6I. source data: The mRNA levels of Muc2 in colon tissue from Control, HBXN2020, STm+PBS, STm+HBXN2020, and STm+CIP groups.
	Control					HBXN2020					STm+PBS					STm+HBXN2020					STm+CIP
	0.695923	1.15561	1.09942	1.04644	1.13912	2.47447	0.385811	0.255681	0.161685	0.206213	1.48135	0.5765	1.38977	0.268029	0.647075	2.06793	0.760187	1.8482	0.925836	0.624306	0.762361	0.374552	0.130465	0.180186	0.208614
	1.02916	0.897647	0.883969	0.977149	0.986017	2.16365	0.250554	0.192803	0.128945	0.179343	1.6542	0.436849	1.55798	0.258558	0.674774	1.80222	0.718127	0.996239	0.991798	0.712657	0.579037	0.261385	0.0975229	0.136722	0.150274
	1.27491	0.946741	1.01661	0.976413	0.87486	3.12227	0.241077	0.18208	0.105711	0.142513	1.50297	0.424596	1.49091	0.250991	0.62438	1.84589	1.1068	1.03239	0.918176	0.473315	0.551011	0.27852	0.091424	0.11405	0.0958551
