# Supplementary material for: Bacillus velezensis HBXN2020 alleviates Salmonella Typhimurium infection in mice by improving intestinal barrier integrity and reducing inflammation
Source: eLife. 2024 Nov 19;13:RP93423. doi: 10.7554/eLife.93423 (PMC11575897; doi:10.7554/eLife.93423)
Supplement: Figure 7—source data 1. [file elife-93423-fig7-data1.xlsx]

## Sheet: Sheet1
	Figure 7—source data 1
	Figure 7A. source data: Sobs index in Control, HBXN2020, STm+PBS, STm+HBXN2020, and STm+CIP groups.
	Control					HBXN2020					STm+PBS					STm+HBXN2020					STm+CIP
	397	440	384	392	364	387	438	404	416	377	345	408	56	292	371	373	340	484	455	391	477	409	373	96	445
	Figure 7B. source data: Chao index in Control, HBXN2020, STm+PBS, STm+HBXN2020, and STm+CIP groups.
	Control					HBXN2020					STm+PBS					STm+HBXN2020					STm+CIP
	460.382	506.373	441.259	475.319	480.17	464.938	498.339	472.297	483.517	427.898	387.022	264.786	71.1111	375.276	430.043	423.538	406.636	570.953	533.333	491.737	567.179	459	440.5	107	487.296
	Figure 7C. source data: Shannon index in Control, HBXN2020, STm+PBS, STm+HBXN2020, and STm+CIP groups.
	Control					HBXN2020					STm+PBS					STm+HBXN2020					STm+CIP
	3.51618	3.67726	3.56979	3.63808	3.23277	3.73476	3.55258	3.46187	3.59708	3.64867	3.73434	3.86546	0.465242	3.14145	3.84321	3.43453	2.48994	4.08689	3.6585	3.53303	4.24496	3.99813	3.8779	2.83723	3.91945
	Figure 7D. source data: Simpson index in Control, HBXN2020, STm+PBS, STm+HBXN2020, and STm+CIP groups.
	Control					HBXN2020					STm+PBS					STm+HBXN2020					STm+CIP
	0.078682	0.067132	0.063609	0.058696	0.118813	0.053422	0.095232	0.095607	0.068551	0.071279	0.054403	0.069842	0.840022	0.132614	0.04282	0.091683	0.261165	0.035663	0.086231	0.09617	0.026212	0.040154	0.046726	0.086508	0.048993
	Figure 7H. source data: Relative abundance of norank_f_Muribaculaceae in Control, HBXN2020, STm+PBS, STm+HBXN2020, and STm+CIP groups.
	Control					HBXN2020					STm+PBS					STm+HBXN2020					STm+CIP
	0.5813	0.59	0.6324	0.6561	0.7021	0.7401	0.7401	0.7603	0.7698	0.7698	0.0061	0.5881	0.3586	0.4324	0.7006	0.5396	0.5515	0.1456	0.6928	0.7249	0.5304	0.5304	0.5432	0.6293	0.7391
	Figure 7I. source data: Relative abundance of Lactobacillus in Control, HBXN2020, STm+PBS, STm+HBXN2020, and STm+CIP groups.
	Control					HBXN2020					STm+PBS					STm+HBXN2020					STm+CIP
	0.0942	0.1197	0.1522	0.1556	0.1623	0.0664	0.0664	0.0695	0.0798	0.0798	0.0018	0.0067	0.013	0.0178	0.0178	0.005	0.0766	0.1096	0.1368	0.139	0.0048	0.0166	0.0341	0.0631	0.0973
	Figure 7J. source data: Relative abundance of Akkermansia in Control, HBXN2020, STm+PBS, STm+HBXN2020, and STm+CIP groups.
	Control					HBXN2020					STm+PBS					STm+HBXN2020					STm+CIP
	0.0567	0.0778	0.084	0.0989	0.1127	0.0005	0.0029	0.0224	0.0226	0.0226	0	0.0007	0.0324	0.0349	0.0349	0.0251	0.0281	0.0434	0.2495	0.4796	0	0.0002	0.001	0.0015	0.0015
	Figure 7K. source data: Relative abundance of Enterococcus in Control, HBXN2020, STm+PBS, STm+HBXN2020, and STm+CIP groups.
	Control					HBXN2020					STm+PBS					STm+HBXN2020					STm+CIP
	0.0008	0.001	0.0015	0.0018	0.0019	0.0009	0.0009	0.001	0.0012	0.0012	0.0086	0.0118	0.0378	0.0508	0.0544	0.0038	0.0053	0.0091	0.0106	0.0113	0.0033	0.0037	0.0046	0.025	0.025
