# Supplementary material for: Bacillus velezensis HBXN2020 alleviates Salmonella Typhimurium infection in mice by improving intestinal barrier integrity and reducing inflammation
Source: eLife. 2024 Nov 19;13:RP93423. doi: 10.7554/eLife.93423 (PMC11575897; doi:10.7554/eLife.93423)
Supplement: Figure 8—figure supplement 1—source data 1. [file elife-93423-fig8-figsupp1-data1.xlsx]

## Sheet: Sheet1
	Figure 8—figure supplement 1—source data 1
	Figure 8—figure supplement 1A. source data: The bacterial load of B. velezensis HBXN2020 in mouse feces.
	1d					2d					3d					4d					5d					6d
	430894	1.30137e+07	2.84553e+07	3.34395e+06	2.89575e+07	816777	110769	41525	1.44867e+06	824561	16301	820	32164.5	1688	87248	163	984	10	702	2120	8	51	105	2	74	0	0	23	16	0
	Figure 8—figure supplement 1B. source data: The bacterial loads of S. Typhimurium ATCC14028 in ileum.
	PBS+STm						HBXN2020+STm						CIP+STm
	2875000	181818	600000	2500000	1000000	357143	23076.9	23076.9	29411.8	33333.3	106667	14285.7	1000	18181.8	2727.27	1428.57	8000	8571.43
	Figure 8—figure supplement 1C. source data: Histological scores of colons.
	Control			HBXN2020			PBS+STm			HBXN2020+STm			CIP+STm
	1	1	1	1	1	1	7	7	8	3	5	4	7	6	5
