# Supplementary material for: Bacillus velezensis HBXN2020 alleviates Salmonella Typhimurium infection in mice by improving intestinal barrier integrity and reducing inflammation
Source: eLife. 2024 Nov 19;13:RP93423. doi: 10.7554/eLife.93423 (PMC11575897; doi:10.7554/eLife.93423)
Supplement: Figure 8—source data 1. [file elife-93423-fig8-data1.xlsx]

## Sheet: Sheet1
	Figure 8—source data 1
	Figure 8B. source data: Daily body weight changes of mice in Control, HBXN2020, PBS+STm, HBXN2020+STm, and CIP+STm groups.
		Control						HBXN2020						PBS+STm						HBXN2020+STm						CIP+STm
	0d	100	100	100	100	100	100	100	100	100	100	100	100	100	100	100	100	100	100	100	100	100	100	100	100	100	100	100	100	100	100
	1d	98.8799	102.887	103.215	100.897	100.238	102.877	101.216	101.968	102.647	105.109	103.943	102.582	103.936	103.335	100.058	99.0708	102.119	101.023	102.614	104.455	104.548	102.081	103.764	103.929	105.066	100.916	102.875	102.139	101.432	104.162
	2d	98.6932	101.768	100.631	98.7448	99.7619	103.625	102.432	103.183	105.295	104.822	103.823	105	103.875	103.335	101.869	98.0256	99.5418	100.662	102.08	103.733	104.791	102.925	102.809	104.94	107.39	102.234	105.321	102.37	103.549	106.936
	3d	100	102.652	101.78	99.462	97.7976	104.776	103.995	102.836	106.378	104.363	105.496	104.835	102.891	101.814	100.175	97.7352	96.1054	98.6153	103.149	101.806	104.488	104.668	103.034	102.262	104.827	101.661	102.752	102.659	101.868	105.187
	4d	99.5022	100.766	101.665	101.913	98.3929	106.214	105.096	100.752	105.776	103.215	104.6	102.857	101.907	101.112	99.8248	99.1289	98.0527	99.4582	101.129	99.8194	104.063	103.206	101.966	101.548	103.933	100.458	103.609	94.5665	110.274	104.222
	5d	101.307	101.827	99.7704	99.6414	97.2619	105.524	104.517	99.7106	104.874	103.444	105.197	103.187	101.23	101.112	100.058	99.4774	100.687	102.95	100.891	104.034	99.4542	104.949	102.584	101.071	103.039	100.115	102.202	95.8382	110.087	105.247
	6d	100.871	101.002	100.459	98.9839	96.9643	103.97	102.548	95.9491	105.355	102.641	103.823	102.527	102.091	100.527	99.007	99.187	98.74	102.468	99.1087	105.539	101.455	102.925	101.798	101.071	102.145	101.661	100.673	95.9538	109.153	104.825
	7d	101.369	101.237	99.7704	100.538	98.0952	105.063	102.721	96.5278	104.874	102.985	101.434	103.187	101.169	99.1808	100	97.6771	98.11	103.733	97.9204	102.769	100	100.562	100.393	98.4524	98.8677	97.2509	101.896	101.329	99.8132	105.187
	8d	102.925	101.12	98.5075	101.853	97.0833	105.869	103.243	97.5694	103.67	103.731	100.717	103.187	97.2325	93.7975	97.3131	97.561	97.4227	99.9398	100.475	102.649	98.7265	97.3566	98.4831	100.417	98.9273	96.8499	104.465	101.792	105.417	103.92
	9d	102.614	99.3518	98.4501	101.016	102.56	105.754	103.648	99.0741	100.361	104.535	100.836	102.473	95.7565	96.5477	98.715	98.4901	95.0745	95.6653	100.772	101.806	100.606	97.7503	98.7079	100.357	98.5101	93.3562	105.443	102.197	100.498	104.343
	10d	103.174	103.3	101.837	105.439	104.167	107.192	105.501	99.537	104.452	106.257	101.613	106.154	95.1415	96.6647	97.1379	96.4576	93.1271	93.9193	99.1087	101.325	101.759	96.9629	99.1573	101.548	98.6293	94.9026	106.972	103.064	103.425	105.428
	11d	105.476	102.121	100.402	103.467	106.905	109.379	105.79	98.9005	106.438	104.822	105.018	104.176	94.5264	94.4997	93.1659	94.5412	92.2108	93.7387	99.8812	101.023	101.637	96.4567	96.8539	101.905	97.9142	103.952	105.138	99.7688	101.245	105.79
	12d	105.103	102.652	102.526	106.635	101.25	105.754	104.98	101.1	103.49	104.65	107.945	105.275	93.4194	94.6752	88.2593	89.7793	90.7216	92.4744	99.9406	99.699	100.485	96.0067	93.7079	99.881	98.1526	105.498	103.242	98.3815	101.183	103.498
	Figure 8C. source data: Daily disease activity index (DAI) scores of mice in Control, HBXN2020, PBS+STm, HBXN2020+STm, and CIP+STm groups.
		Control						HBXN2020						PBS+STm						HBXN2020+STm						CIP+STm
	0d	0	0	0	0	0	0	0	0	0	0	0	0	0	0	0	0	0	0	0	0	0	0	0	0	0	0	0	0	0	0
	1d	0	0	1	0	0	0	0	0	0	0	1	0	2	1	1	1	2	1	1	1	1	1	1	1	1	1	1	0	2	0
	2d	0	0	1	0	0	0	0	0	1	0	1	0	2	3	1	2	2	2	0	1	1	1	3	1	1	2	0	1	1	1
	3d	0	1	1	0	0	0	0	0	1	0	2	0	3	3	2	3	1	3	0	1	0	2	1	1	1	3	0	0	3	0
	4d	0	0	0	0	0	0	0	0	0	0	2	0	3	3	2	3	2	3	0	2	0	3	2	1	2	2	0	0	2	0
	5d	0	0	1	0	0	0	0	0	0	0	0	0	4	3	3	2	4	4	0	1	0	3	2	0	1	1	0	0	3	0
	6d	0	0	0	0	0	0	0	0	1	0	0	0	4	3	4	3	4	4	0	1	0	3	4	2	1	0	0	0	3	1
	Figure 8E. source data: The length of the colon in Control, HBXN2020, PBS+STm, HBXN2020+STm, and CIP+STm groups.
	Control						HBXN2020						PBS+STm						HBXN2020+STm						CIP+STm
	6	6.3	6.5	6.8	6.2	6.4	7	7.1	7.3	6.8	6.9	7	5.1	5.2	5.3	5.2	5	5.7	6.2	6.5	6.5	6.6	6.4	5.8	6.5	6.7	6.8	6	6.5	5.9
	Figure 8F. source data: Bacterial count of STm in mouse feces from PBS+STm, HBXN2020+STm and CIP+STm groups.
		PBS+STm						HBXN2020+STm						CIP+STm
	1d	100000000	50000000	3.66667e+07	160000000	100000000	25000000	2000000	57500000	6250000	12000000	50000000	12500000	2500000	5000000	8750000	10000000	16000000	20000000
	2d	333333	2.66667e+06	2500000	2000000	500000	1000000	250000	171429	375000	320000	333333	3.33333e+06	66666.7	333333	150000	375000	100000	45000
	3d	750000	285714	333333	100000	1700000	266667	100000	200000	200000	3333.33	5000	2500	25000	50000	25000	14285.7	14285.7	50000
	4d	200000	125000	110000	300000	550000	200000	7500	15000	6666.67	5000	2500	10000	2500	1666.67	3000	2857.14	7500	333.333
	5d	2500000	666667	1600000	4000000	2500000	4000000	20000	300000	7500	25000	25000	50000	17500	41666.7	15000	4285.71	16000	27500
	6d	4000000	5000000	8000000	766667	3750000	2000000	60000	18750	33333.3	5000	5000	28571.4	100000	275000	10000	3333.33	50000	20000
	Figure 8G. source data: The bacterial loads of STm in cecum.
	PBS+STm						HBXN2020+STm						CIP+STm
	750000	2.10526e+06	307692	2500000	1.53846e+06	526316	166667	12500	7142.86	90000	16250	83333.3	1818.18	2857.14	9000	2000	25000	266667
	Figure 8H. source data: The bacterial loads of STm in colon.
	PBS+STm						HBXN2020+STm						CIP+STm
	6.36364e+06	2000000	5000000	1.88235e+06	5000000	533333	20000	11818.2	21666.7	222222	7142.86	5714.29	1000	2500	8333.33	14285.7	33000	90909.1
