# Supplementary material for: Bacillus velezensis HBXN2020 alleviates Salmonella Typhimurium infection in mice by improving intestinal barrier integrity and reducing inflammation
Source: eLife. 2024 Nov 19;13:RP93423. doi: 10.7554/eLife.93423 (PMC11575897; doi:10.7554/eLife.93423)
Supplement: Figure 9—source data 1. [file elife-93423-fig9-data1.xlsx]

## Sheet: Sheet1
	Figure 9—source data 1
	Figure 9B. source data: The mRNA levels of Tnfa in Control, HBXN2020, PBS+STm, HBXN2020+STm, and CIP+STm groups.
	Control					HBXN2020					PBS+STm					HBXN2020+STm					CIP+STm
	1.71644	1.29454	0.880053	0.923868	1.32455	1.09441	0.902639	0.619347	0.337501	0.453529	0.453543	1.52138	4.95293	0.973622	1.09874	0.960783	0.395383	1.39001	0.677517	0.610323	1.04611	2.60995	1.47262	1.32377	0.414082
	0.730039	0.959076	1.06314	0.954986	0.813193	0.930997	1.07686	0.771619	0.289963	0.162901	0.447263	1.47776	3.62161	0.897951	1.16038	0.84756	1.27	1.44344	0.700994	0.590215	1.08192	2.32329	1.01739	1.65042	0.669304
	0.553519	0.746379	1.05681	1.12115	0.862254	0.645172	1.18667	0.587728	0.217621	0.284046	0.731358	1.4664	3.75831	1.1163	1.09179	0.635858	1.12699	1.64664	0.724094	0.823397	1.46321	2.04311	1.04985	1.36845	0.428297
	Figure 9C. source data: The mRNA levels of Il1b in Control, HBXN2020, PBS+STm, HBXN2020+STm, and CIP+STm groups.
	Control					HBXN2020					PBS+STm					HBXN2020+STm					CIP+STm
	1.16586	0.97427	1.13773	0.977727	0.739527	0.22261	0.908768	0.453005	0.172482	0.407272	0.446998	2.37865	1.86444	0.674764	0.973602	0.276116	0.283617	0.899998	0.163953	1.04006	1.1775	0.776363	1.16287	0.152592	0.382436
	0.976546	1.15277	0.856005	0.926013	1.13843	0.259218	0.98493	0.505037	0.176287	0.393536	0.428951	1.6655	1.35952	0.890444	0.952571	0.410932	0.247256	0.884259	0.153191	0.692971	0.841583	0.828424	1.6202	0.183937	0.287202
	0.857593	0.872962	1.00626	1.09626	1.12205	0.236777	0.527508	0.607494	0.229339	0.488646	0.442149	1.89923	2.57151	0.695184	1.04559	0.398751	0.468625	0.823162	0.156328	0.567615	0.889111	1.19206	1.76786	0.161474	0.37523
	Figure 9D. source data: The mRNA levels of Il6 in Control, HBXN2020, PBS+STm, HBXN2020+STm, and CIP+STm groups.
	Control					HBXN2020					PBS+STm					HBXN2020+STm					CIP+STm
	0.708773	0.725684	1.12478	1.03082	1.17029	0.934052	1.19672	1.69216	1.90626	0.458383	2.13825	1.14256	0.711379	0.880513	1.25576	0.385411	0.699837	0.572205	0.891903	0.934274	1.37477	0.995607	1.12698	2.5734	0.632927
	1.20414	0.908079	0.83721	0.962622	0.80928	1.01074	1.2549	1.38005	1.68592	0.509405	1.00315	1.20246	0.926406	2.90251	1.4279	0.597896	0.900501	0.53516	0.909041	0.788383	1.33504	0.941328	1.08992	1.39287	0.561438
	1.08709	1.36624	1.03801	1.00656	1.02043	0.726279	1.11291	1.46972	1.23129	0.533425	1.89077	1.20262	1.13629	0.801646	1.75889	0.576669	0.227392	0.447416	1.06951	0.790708	1.1997	1.31379	1.01245	1.8775	0.943915
	Figure 9E. source data: The mRNA levels of Il10 in Control, HBXN2020, PBS+STm, HBXN2020+STm, and CIP+STm groups.
	Control					HBXN2020					PBS+STm					HBXN2020+STm					CIP+STm
	0.823141	1.22457	0.75186	0.991882	1.1259	0.66103	1.84227	1.8986	0.94048	0.952176	0.523435	0.642365	1.00411	0.417326	0.401843	0.468193	0.87233	0.941738	0.499091	0.597248	0.765607	1.25056	1.79642	0.752625	0.671194
	1.06706	0.89005	1.16621	1.04253	0.956239	0.641434	1.94368	1.19261	0.976716	0.697901	0.41536	0.690968	0.983307	0.341802	0.217792	0.502168	0.686296	1.26449	0.496612	0.833247	1.07751	1.15593	1.46371	0.913857	0.565777
	1.1098	0.88538	1.08193	0.965584	0.917864	0.479597	1.64705	1.60052	0.711531	1.0057	0.204598	0.682507	1.10685	0.415992	0.212524	0.499851	0.767039	1.20844	0.545263	0.964152	0.745186	1.42505	1.63956	0.881283	0.628912
	Figure 9F. source data: The mRNA levels of Tjp1 in Control, HBXN2020, PBS+STm, HBXN2020+STm, and CIP+STm groups.
	Control					HBXN2020					PBS+STm					HBXN2020+STm					CIP+STm
	1.09269	1.33098	1.25726	1.05068	1.0587	0.437186	0.0137654	2.04135	0.862136	1.91499	1.93012	0.981814	1.80382	3.61382	6.01401	8.12056	1.12959	0.535866	5.47858	3.93974	2.29	1.06454	0.081707	5.53705	3.94633
	0.880188	0.956091	1.03662	0.824496	0.88125	0.479717	0.0179126	2.40041	0.766564	2.11932	2.60652	1.14423	1.49138	3.15126	6.20803	6.05159	1.05674	0.851406	5.08043	5.67124	1.99305	1.04142	0.0542975	5.53645	3.0836
	1.02713	0.712927	0.706123	1.12483	1.06005	0.427022	0.0117737	2.48716	1.00197	1.96788	1.80498	0.718696	1.39088	3.99742	6.86038	7.47163	1.37092	1.25394	4.91471	3.40291	2.39932	0.783561	0.0773901	4.75415	4.10923
	Figure 9G. source data: The mRNA levels of Ocln in Control, HBXN2020, PBS+STm, HBXN2020+STm, and CIP+STm groups.
	Control					HBXN2020					PBS+STm					HBXN2020+STm					CIP+STm
	0.839148	1.73684	0.590532	0.687477	0.867077	0.284203	0.425128	2.39464	1.74694	1.29058	0.748255	0.676655	0.303414	1.16503	0.905236	1.20318	1.55946	1.11355	1.96737	1.21642	1.0927	0.0091438	1.16256	0.811844	1.08402
	0.90798	1.09809	0.768383	0.982478	0.767897	0.307205	0.489925	1.82427	1.99617	1.09419	0.704807	0.631603	0.237086	1.06569	1.17441	1.04094	0.948725	1.458	2.10006	2.55118	1.4086	2.43024	0.423951	0.880247	0.923817
	1.25287	0.165073	1.64108	1.33004	1.36503	0.364842	0.452027	1.22441	1.32899	0.841905	0.63666	0.714007	0.339592	0.743814	1.01954	1.61139	1.41573	1.54482	0.470976	1.34067	1.92121	0.00623477	2.17697	0.697569	0.756079
	Figure 9H. source data: The mRNA levels of Cldn1 in Control, HBXN2020, PBS+STm, HBXN2020+STm, and CIP+STm groups.
	Control					HBXN2020					PBS+STm					HBXN2020+STm					CIP+STm
	1.00182	1.21965	1.17265	0.958329	1.0944	1.08825	1.09006	1.00065	0.910926	1.14648	0.335881	0.596979	0.633338	0.46365	0.654444	0.895509	1.02513	0.695554	1.18616	0.810433	0.664949	0.855709	0.822713	1.1306	1.22932
	0.894519	0.951704	0.859813	0.921714	0.912076	0.957555	1.39224	1.20367	1.42072	1.38769	0.385359	0.753416	0.7007	0.686744	0.965127	1.43801	1.13368	1.03068	0.594374	1.01921	1.01804	1.21968	0.78458	0.838918	1.43899
	1.10366	0.828648	0.967542	1.11996	0.993526	1.1542	1.03912	1.22614	1.21987	1.02522	0.356041	0.905132	0.500127	0.717934	0.980216	0.903983	0.995761	0.646927	0.981209	0.776544	1.173	0.812008	0.881423	0.898906	0.818734
	Figure 9I. source data: The mRNA levels of Muc2 in Control, HBXN2020, PBS+STm, HBXN2020+STm, and CIP+STm groups.
	Control					HBXN2020					PBS+STm					HBXN2020+STm					CIP+STm
	0.886145	0.990779	1.06	1.13771	0.985577	2.22817	0.144633	0.663587	2.18764	3.20161	2.21788	0.38911	1.23103	1.07846	1.55209	7.02748	0.182393	0.706534	1.30866	2.37052	2.82678	0.526681	0.0155076	3.24687	3.35188
	1.00447	1.04682	1.05181	0.939536	1.05805	2.56181	0.187772	0.565161	1.9593	3.26239	1.62421	0.363523	1.01344	0.773441	1.27421	6.60434	0.174853	0.780535	1.33472	3.0331	3.31581	0.537244	0.0146615	1.98816	3.02851
	1.10938	0.962405	0.888186	0.922757	0.956371	1.12576	0.225522	0.666502	2.27541	3.15358	2.39611	0.610659	0.992547	0.86023	1.61985	6.54318	0.229474	0.826938	1.44002	2.70838	0.963327	0.435781	0.0119864	2.0099	3.2131
