# Supplementary material for: Bacillus velezensis HBXN2020 alleviates Salmonella Typhimurium infection in mice by improving intestinal barrier integrity and reducing inflammation
Source: eLife. 2024 Nov 19;13:RP93423. doi: 10.7554/eLife.93423 (PMC11575897; doi:10.7554/eLife.93423)
Supplement: Figure 10—source data 1. [file elife-93423-fig10-data1.xlsx]

## Sheet: Sheet1
	Figure 10—source data 1
	Figure 10A. source data: Sobs index in Control, HBXN2020, PBS+STm, HBXN2020+STm, and CIP+STm groups.
	Control					HBXN2020					PBS+STm					HBXN2020+STm					CIP+STm
	363	363	391	372	341	411	443	366	436	446	353	424	423	420	405	420	349	431	401	428	414	359	522	376	397
	Figure 10B. source data: Chao index in Control, HBXN2020, PBS+STm, HBXN2020+STm, and CIP+STm groups.
	Control					HBXN2020					PBS+STm					HBXN2020+STm					CIP+STm
	413.538	413.714	447.633	424.684	393.784	477.733	520.782	447	510.455	524.333	394.553	496.818	486.984	483.851	468.865	480.508	400.032	507.684	496.233	501.1	480.733	410.419	572.329	442.42	457.769
	Figure 10C. source data: Shannon index in Control, HBXN2020, PBS+STm, HBXN2020+STm, and CIP+STm groups.
	Control					HBXN2020					PBS+STm					HBXN2020+STm					CIP+STm
	3.6011	3.1434	3.33001	3.51141	3.53213	3.51128	3.87063	3.67143	4.02053	4.04011	4.0397	4.38287	3.95999	3.94896	4.00821	3.67592	3.51453	3.86773	3.8695	3.60887	3.7969	4.06117	4.01471	3.78985	3.86199
	Figure 10D. source data: Simpson index in Control, HBXN2020, PBS+STm, HBXN2020+STm, and CIP+STm groups.
	Control					HBXN2020					PBS+STm					HBXN2020+STm					CIP+STm
	0.066222	0.130366	0.141684	0.069056	0.069039	0.103182	0.051037	0.051394	0.036463	0.044938	0.033006	0.022292	0.03637	0.048691	0.037267	0.070454	0.075062	0.063201	0.045393	0.087525	0.058346	0.032515	0.044156	0.048466	0.039676
	Figure 10H. source data: Relative abundance of Lactobacillus in Control, HBXN2020, PBS+STm, HBXN2020+STm, and CIP+STm groups.
	Control					HBXN2020					PBS+STm					HBXN2020+STm					CIP+STm
	0.048	0.0523	0.1464	0.1827	0.2109	0.1132	0.1132	0.1133	0.1248	0.1248	0.0003	0.0008	0.0049	0.0175	0.0384	0.063	0.093	0.1177	0.1316	0.1731	0.0634	0.0634	0.0725	0.0802	0.0802
	Figure 10I. source data: Relative abundance of Akkermansia in Control, HBXN2020, PBS+STm, HBXN2020+STm, and CIP+STm groups.
	Control					HBXN2020					PBS+STm					HBXN2020+STm					CIP+STm
	0.0163	0.0596	0.0984	0.1384	0.1469	0.0003	0.0004	0.0016	0.0055	0.0055	0.0001	0.0009	0.002	0.0059	0.0059	0.009	0.0143	0.0443	0.0682	0.0682	0	0.0007	0.0008	0.0048	0.0048
	Figure 10J. source data: Relative abundance of Alistipes in Control, HBXN2020, PBS+STm, HBXN2020+STm, and CIP+STm groups.
	Control					HBXN2020					PBS+STm					HBXN2020+STm					CIP+STm
	0.0021	0.0028	0.0028	0.0037	0.0037	0.0028	0.0029	0.0048	0.0058	0.0058	0.0246	0.0246	0.0283	0.0328	0.0373	0.003	0.0031	0.007	0.0082	0.0147	0.0036	0.0036	0.0036	0.0043	0.0043
	Figure 10K. source data: Relative abundance of Bacteroides in Control, HBXN2020, PBS+STm, HBXN2020+STm, and CIP+STm groups.
	Control					HBXN2020					PBS+STm					HBXN2020+STm					CIP+STm
	0.0028	0.0034	0.0044	0.0058	0.0058	0.003	0.0036	0.0052	0.014	0.0174	0.0037	0.0178	0.0312	0.054	0.101	0.0036	0.0037	0.0039	0.0045	0.0053	0.0023	0.0024	0.0042	0.0051	0.0074
	Figure 10L. source data: Relative abundance of Escherichia-Shigella in Control, HBXN2020, PBS+STm, HBXN2020+STm, and CIP+STm groups.
	Control					HBXN2020					PBS+STm					HBXN2020+STm					CIP+STm
	3e-05	3e-05	3e-05	3e-05	5.8e-05	3e-05	3e-05	3e-05	3e-05	0.0015	0.0003	0.0003	0.0018	0.047	0.0505	3e-05	3e-05	3e-05	3e-05	5.8e-05	3e-05	3e-05	3e-05	3e-05	3e-05
	Figure 10M. source data: Relative abundance of Enterococcus in Control, HBXN2020, PBS+STm, HBXN2020+STm, and CIP+STm groups.
	Control					HBXN2020					PBS+STm					HBXN2020+STm					CIP+STm
	0.0003	0.0008	0.0014	0.0014	0.0014	0.0008	0.001	0.0016	0.005	0.005	0.002	0.0047	0.0103	0.0313	0.0313	0.0005	0.0007	0.0015	0.0022	0.0035	0.0002	0.0004	0.001	0.0019	0.0019
