# Supplementary material for: Bacillus velezensis HBXN2020 alleviates Salmonella Typhimurium infection in mice by improving intestinal barrier integrity and reducing inflammation
Source: eLife. 2024 Nov 19;13:RP93423. doi: 10.7554/eLife.93423 (PMC11575897; doi:10.7554/eLife.93423)
Supplement: Supplementary file 1. [file elife-93423-supp1.docx]

**Supplementary** **file 1. Determination of antibacterial activity of different *Bacillus***

| **Bacteria**  **and serovars** | **Strain no.** | 1. ***subtilis***   **BSH1** | ***B. velezensis***  **HBXN2020** | ***B. amyloliquefaciens***  **6-1** | 1. ***licheniformis***   **BSK14** |
| --- | --- | --- | --- | --- | --- |
| *E. coli* | EC006 | - | ++ | + | - |
| EC016 | - | +++ | + | - |
| EC022 | - | ++ | - | - |
| EC024 | - | +++ | ++ | - |
| ATCC  35150 | - | +++ | ++ | - |
| ATCC  25922 | - | +++ | ++ | - |
| *S.* Typhimurium | ST001 | - | +++ | ++ | - |
| ST002 | - | ++ | +++ | - |
| ST003 | - | + | + | - |
| ST004 | - | +++ | + | - |
| ST005 | - | +++ | ++ | - |
| ST006 | - | +++ | +++ | - |
| ST007 | - | +++ | ++ | - |
| SL1344 | - | +++ | ++ | - |
| ATCC  14028 | - | +++ | + | - |
| 1. Enteritidis | SE001 | - | +++ | ++ | - |
| SE002 | - | +++ | ++ | - |
| SE003 | - | +++ | ++ | - |
| SE004 | - | +++ | +++ | - |
| SE005 | - | ++ | ++ | - |
| SE006 | - | +++ | ++ | - |
| *S. aureus* | S1 | ++ | +++ | +++ | +++ |
| S2 | ++ | +++ | +++ | +++ |
| S3 | ++ | +++ | +++ | ++ |
| S4 | ++ | +++ | +++ | ++ |
| S5 | ++ | +++ | +++ | +++ |
| S6 | +++ | +++ | +++ | +++ |
| S10 | ++ | ++ | +++ | +++ |
| S11 | ++ | +++ | +++ | ++ |
| S12 | ++ | ++ | +++ | ++ |
| S13 | ++ | ++ | + | +++ |
| S14 | ++ | ++ | ++ | +++ |
| S15 | +++ | +++ | +++ | ++ |
| S16 | +++ | ++ | ++ | ++ |
| S17 | +++ | ++ | +++ | ++ |
| S18 | ++ | +++ | +++ | +++ |
| S19 | ++ | ++++ | +++ | +++ |
| S20 | ++ | ++ | +++ | ++ |
| S21 | ++ | +++ | ++ | +++ |
| ATCC  43300 | ++ | +++ | +++ | +++ |
| ATCC  25923 | ++ | +++ | +++ | ++ |
| ATCC  29213 | +++ | +++ | +++ | ++ |
| *S. suis* | SS006 | ++ | +++ | +++ | + |
| SS12 | ++ | +++ | +++ | ++ |
| SS54 | +++ | ++ | ++ | ++ |
| SS55 | ++ | ++ | ++ | ++ |
| SS57 | ++ | ++ | ++ | ++ |
| SS58 | +++ | +++ | +++ | ++ |
| SS59 | ++ | +++ | ++ | ++ |
| SS60 | +++ | ++ | +++ | +++ |
| SS61 | ++ | +++ | +++ | ++ |
| SS62 | ++ | ++ | ++ | ++ |
| SS63 | ++ | ++ | ++ | +++ |
| SS64 | ++ | ++ | ++ | ++ |
| SC19 | ++ | ++ | +++ | ++ |
| *C. perfringens* | CP001 | ++ | +++ | +++ | +++ |
| CP002 | +++ | ++++ | +++ | +++ |
| CP003 | ++ | +++ | +++ | +++ |
| CP004 | ++ | +++ | +++ | +++ |
| CP005 | ++ | +++ | +++ | +++ |
| CP006 | +++ | +++ | +++ | +++ |
| CP007 | ++ | +++ | +++ | +++ |
| CP008 | ++ | +++ | +++ | +++ |
| CP009 | ++ | +++ | +++ | +++ |
| CP010 | ++ | +++ | +++ | +++ |
| CP011 | ++ | +++ | +++ | +++ |
| CP012 | ++ | +++ | +++ | +++ |
| CP013 | ++ | +++ | +++ | +++ |
| CP014 | ++ | +++ | +++ | +++ |
| CP015 | ++ | +++ | +++ | +++ |
| CP016 | ++ | +++ | +++ | +++ |
| CP017 | ++ | +++ | +++ | +++ |
| CP018 | ++ | +++ | +++ | +++ |
| CP023 | ++ | ++++ | +++ | +++ |
| CVCC  2030 | ++ | ++++ | +++ | ++++ |
| *A. pleuropneumoniae* | APP015 | - | ++ | + | - |
| APP016 | - | ++ | ++ | - |
| APP017 | - | ++ | ++ | - |
| APP018 | - | ++ | + | - |
| *P. multocida* | PM002 | - | +++ | ++ | - |
| PM008 | - | +++ | +++ | - |

Note: -, No antibacterial activity; +, 0 < bacteriostatic diameter ≤ 5; ++, 5 < bacteriostatic diameter ≤ 15; +++, 15 < bacteriostatic diameter ≤ 20；++++, 20 < bacteriostatic diameter.
