# Supplementary figures and images for: Bacillus velezensis HBXN2020 alleviates Salmonella Typhimurium infection in mice by improving intestinal barrier integrity and reducing inflammation
Source: eLife journal article supplement (doi:10.7554/elife.93423), 2024-03-12

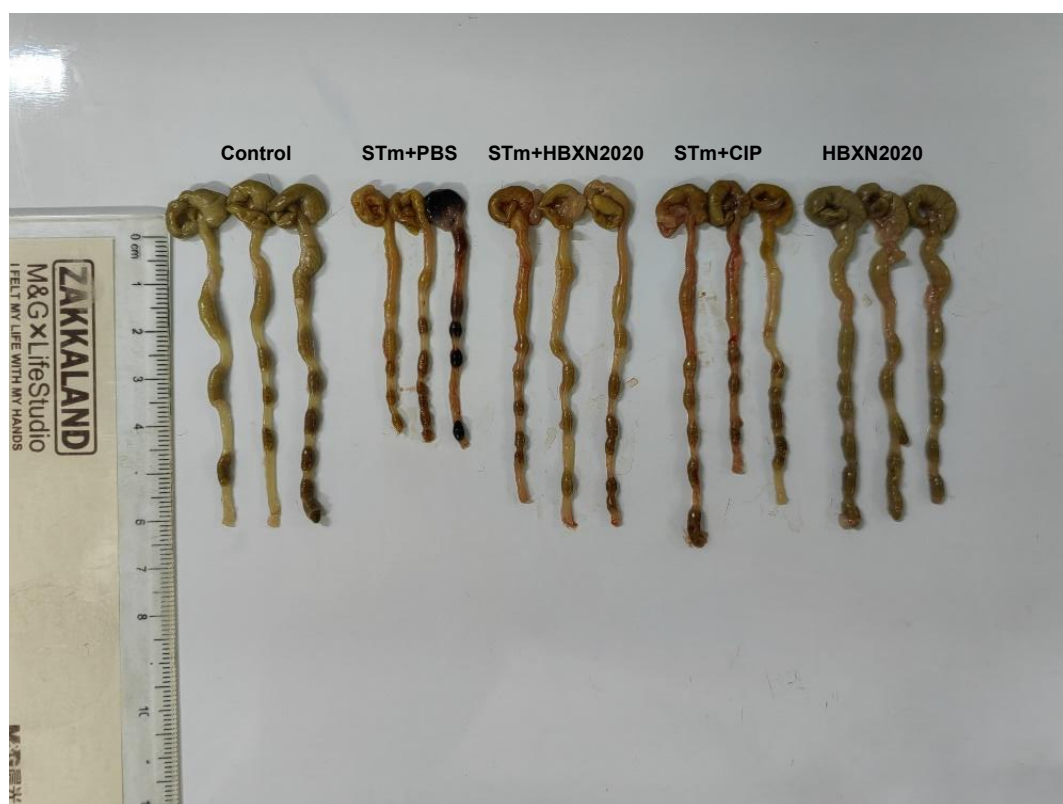

Fig. 5H. Colonic tissue images of mice in Control, STm+PBS, STm+HBXN2020, STm+CIP and HBXN2020 groups.

Supplement: fig5-data2 [file elife-93423-fig5-data2-v1.zip]

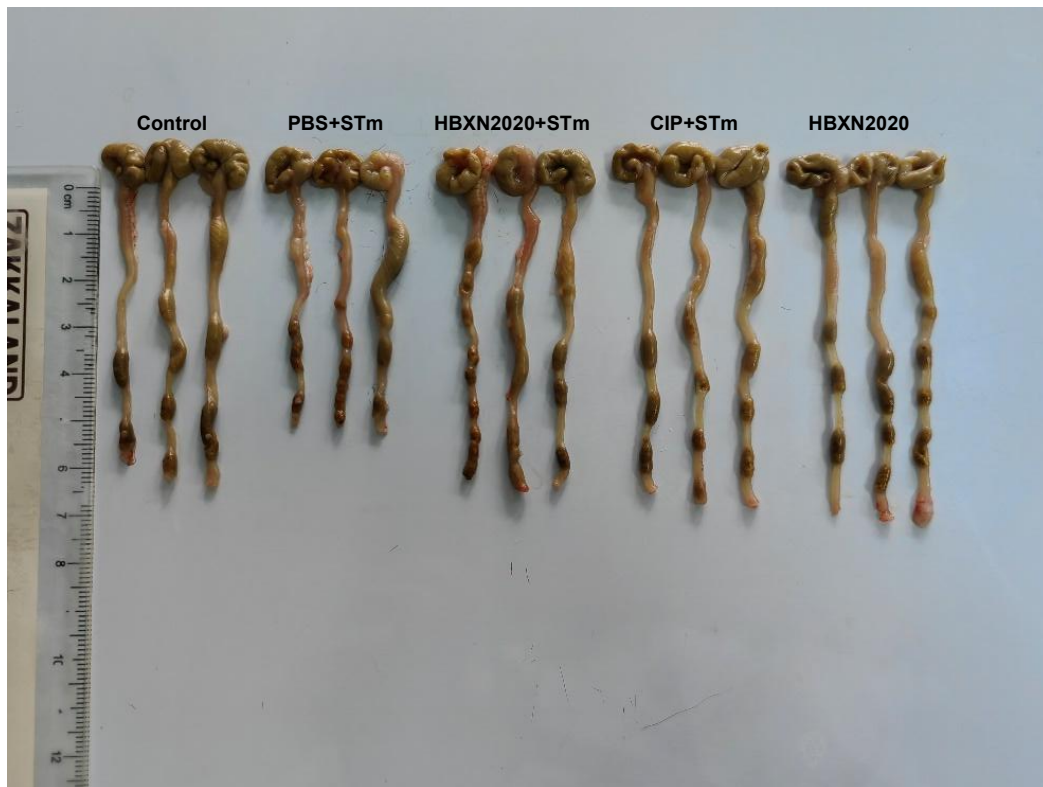

Fig. 8D. Colonic tissue images of mice in Control, PBS+STm, HBXN2020+STm, CIP+STm and HBXN2020 groups.

Supplement: fig8-data2 [file elife-93423-fig8-data2-v1.zip]
